# Supplementary material for: Comprehensive analysis of predictive significance of PRR11 in glioma at multiple-datasets and single-cell sequencing levels
Source: Research Square preprint supplement (doi:10.21203/rs.3.rs-2407977/v1), 2024-04-29
Supplement: Supplementary file 1 [file 5ba55a5ca80ead03a0b1fee6.pdf]

**Table.S1** Baseline characteristics of CGGA participants stratified by PRR11 expression

| Characteristic          | Low expression of PRR11 | High expression of PRR11 | P      |
|-------------------------|-------------------------|--------------------------|--------|
| n                       | 162                     | 163                      |        |
| Age, median(IQR)        | 41.5 (28.5, 54.5)       | 43 (26, 60)              | 0.256  |
| Gender, n(%)            |                         |                          | 0.15   |
| Female                  | 67 (41.4%)              | 55 (33.7%)               |        |
| Male                    | 95 (58.6%)              | 108 (66.3%)              |        |
| WHO grade, n(%)         |                         |                          | <0.001 |
| WHO II                  | 81 (50%)                | 22 (13.5%)               |        |
| WHO III                 | 33 (20.4%)              | 46 (28.2%)               |        |
| WHO IV                  | 48 (29.6%)              | 91 (55.8%)               |        |
| IDH status, n(%)        |                         |                          | <0.001 |
| Wildtype                | 57 (35.2%)              | 92 (56.4%)               |        |
| Mutation                | 104 (64.2%)             | 71 (43.6%)               |        |
| 1p/19q codeletion, n(%) |                         |                          | <0.001 |
| codel                   | 57 (35.2%)              | 10 (6.1%)                |        |
| Non-codel               | 102 (63.0%)             | 148 (90.8%)              |        |

**Table.S2** Baseline characteristics of TCGA participants stratified by PRR11 expression

| Characteristic          | Low expression of PRR11 | High expression of PRR11 | P      |
|-------------------------|-------------------------|--------------------------|--------|
| n                       | 348                     | 348                      |        |
| Age, median(IQR)        | 42 (34, 53)             | 50 (35, 62)              | <0.001 |
| Gender, n(%)            |                         |                          | 0.592  |
| Female                  | 153 (44.0%)             | 145 (41.7%)              |        |
| Male                    | 195 (56.0%)             | 203 (58.3%)              |        |
| WHO grade, n(%)         |                         |                          | <0.001 |
| WHO II                  | 163 (46.8%)             | 61 (17.5%)               |        |
| WHO III                 | 120(34.5%)              | 123 (35.3%)              |        |
| WHO IV                  | 18 (5.2%)               | 150 (43.0%)              |        |
| IDH status, n(%)        |                         |                          | <0.001 |
| Wildtype                | 53 (15.2%)              | 193 (55.5%)              |        |
| Mutation                | 293 (84.2%)             | 147 (42.2%)              |        |
| 1p/19q codeletion, n(%) |                         |                          | <0.001 |
| codel                   | 152 (43.7%)             | 19 (5.5%)                |        |
| Non-codel               | 195 (56.0%)             | 323 (92.8%)              |        |

**Table.S3** Association between PRR11 expression and immune infiltration in glioma

| Cancer | Variable       | Partial.cor | P                |
|--------|----------------|-------------|------------------|
| GBM    | Purity         | 0.411       | <b>&lt;0.001</b> |
| GBM    | B Cell         | -0.075      | 0.406            |
| GBM    | CD8+ T Cell    | -0.198      | <b>0.024</b>     |
| GBM    | CD4+ T Cell    | -0.033      | 0.707            |
| GBM    | Macrophage     | -0.117      | 0.182            |
| GBM    | Neutrophil     | 0.011       | 0.905            |
| GBM    | Dendritic Cell | 0.095       | 0.281            |
| LGG    | Purity         | 0.016       | 0.723            |
| LGG    | B Cell         | 0.465       | <b>&lt;0.001</b> |
| LGG    | CD8+ T Cell    | 0.415       | <b>&lt;0.001</b> |
| LGG    | CD4+ T Cell    | 0.282       | <b>&lt;0.001</b> |
| LGG    | Macrophage     | 0.361       | <b>&lt;0.001</b> |
| LGG    | Neutrophil     | 0.387       | <b>&lt;0.001</b> |
| LGG    | Dendritic Cell | 0.403       | <b>&lt;0.001</b> |

LGG (n = 469), low grade glioma; GBM (n = 414), glioblastoma.

**Table.S4** Univariate analysis of the correlation among PRR11 expression, immune infiltration, and OS in patients with glioma

| Cancer | Variable       | <i>P</i>         |
|--------|----------------|------------------|
| GBM    | B Cell         | <b>0.047</b>     |
| GBM    | CD8+ T Cell    | 0.497            |
| GBM    | CD4+ T Cell    | 0.288            |
| GBM    | Macrophage     | 0.955            |
| GBM    | Neutrophil     | 0.147            |
| GBM    | Dendritic Cell | <b>0.01</b>      |
| GBM    | PRR11          | 0.64             |
| LGG    | B Cell         | <b>&lt;0.001</b> |
| LGG    | CD8+ T Cell    | <b>0.01</b>      |
| LGG    | CD4+ T Cell    | <b>&lt;0.001</b> |
| LGG    | Macrophage     | <b>&lt;0.001</b> |
| LGG    | Neutrophil     | <b>&lt;0.001</b> |
| LGG    | Dendritic Cell | <b>&lt;0.001</b> |
| LGG    | PRR11          | <b>&lt;0.001</b> |

*LGG (n = 469), low grade glioma; GBM (n = 414), glioblastoma.*

**Table.S5** Multivariate analysis of the correlation of PRR11 expression with immune infiltrates and OS in patients with GBM

|               | Coef   | HR     | 95%CI_l | 95%CI_u | P-value | Sig |
|---------------|--------|--------|---------|---------|---------|-----|
| Age           | 0.022  | 1.022  | 1.002   | 1.042   | 0.033   | *   |
| Gender (Male) | 0.225  | 1.253  | 0.771   | 2.036   | 0.363   |     |
| Purity        | -0.627 | 0.534  | 0.097   | 2.938   | 0.471   |     |
| B_cell        | -0.577 | 0.562  | 0.08    | 3.935   | 0.561   |     |
| CD8_Tcell     | 0.568  | 1.764  | 0.498   | 6.25    | 0.379   |     |
| CD4_Tcell     | 3.304  | 27.229 | 2.484   | 298.47  | 0.007   | **  |
| Macrophage    | 0.723  | 2.06   | 0.178   | 23.858  | 0.563   |     |
| Neutrophil    | -1.32  | 0.267  | 0.013   | 5.538   | 0.393   |     |
| Dendritic     | 0.825  | 2.281  | 0.812   | 6.41    | 0.118   |     |
| PRR11         | 0.138  | 1.148  | 0.864   | 1.523   | 0.341   |     |

GBM (n = 414), glioblastoma. \*P < 0.05; \*\*P < 0.01.

**Table.S6** Multivariate analysis of the correlation of PRR11 expression with immune infiltrates and OS in patients with LGG

|               | Coef   | HR      | 95%CI_l | 95%CI_u   | P-value | Sig |
|---------------|--------|---------|---------|-----------|---------|-----|
| Age           | 0.058  | 1.06    | 1.043   | 1.078     | 0       | *** |
| Gender (Male) | 0.178  | 1.195   | 0.794   | 1.799     | 0.392   |     |
| Purity        | -0.554 | 0.575   | 0.222   | 1.486     | 0.253   |     |
| B_cell        | -0.856 | 0.425   | 0.001   | 281.296   | 0.796   |     |
| CD8_Tcell     | 0.225  | 1.253   | 0.001   | 1498.85   | 0.95    |     |
| CD4_Tcell     | -2.076 | 0.125   | 0       | 591.017   | 0.63    |     |
| Macrophage    | 5.748  | 313.501 | 4.016   | 24474.825 | 0.01    | *   |
| Neutrophil    | -3.803 | 0.022   | 0       | 130.876   | 0.39    |     |
| Dendritic     | 1.803  | 6.066   | 0.097   | 380.627   | 0.393   |     |
| PRR11         | 0.568  | 1.764   | 1.401   | 2.221     | 0       | *** |

LGG (n = 459), low grade glioma. \*P < 0.05; \*\*\*P < 0.001.

**Table.S7** Top 20 genes positively or negatively correlated with PRR11

| Top 20 genes positively correlated with PRR11 | Top 20 genes negatively correlated with PRR11 |
|-----------------------------------------------|-----------------------------------------------|
| KIF14                                         | AATK                                          |
| BUB1                                          | ABCC8                                         |
| CDCA8                                         | ADAP1                                         |
| NCAPG                                         | ADHFE1                                        |
| NUSAP1                                        | AIFM3                                         |
| CCNB2                                         | ALDH2                                         |
| KIF2C                                         | ANKRD24                                       |
| KIF4A                                         | ARHGDIG                                       |
| MELK                                          | ASPDH                                         |
| TPX2                                          | ATP6V1G2                                      |
| ARHGAP11A                                     | AVPI1                                         |
| BIRC5                                         | CA4                                           |
| CCNA2                                         | CACNA1I                                       |
| DEPDC1                                        | CALN1                                         |
| DLGAP5                                        | CBX7                                          |
| FOXM1                                         | CDIP1                                         |
| HMMR                                          | CORO6                                         |
| KIF20A                                        | CPE                                           |
| NCAPG2                                        | CPEB1                                         |
| SKA1                                          | LDHD                                          |
